# Supplementary material for: Triggers of the 2022 Larsen B multi-year landfast sea ice break-out and initial glacier response
Source: Copernicus journal article supplement (doi:10.5194/tc-2023-88), 2023-06-27
Supplement: Supplementary file 1 [file tc-2023-88-supplement.pdf]

## Supplemental of

# “Triggers of the 2022 Larsen B multi-year landfast sea ice break-out and initial glacier response”

5 Ochwat et al., 2023

*Correspondence to:* naomi.ochwat@colorado.edu

| Sensor | Acquisition Date | Sensor | Acquisition Date |
|--------|------------------|--------|------------------|
| WV2    | 3/9/17           | WV3    | 4/21/21          |
| WV2    | 4/18/17          | WV3    | 1/15/22          |
| WV1    | 4/22/17          | WV2    | 2/14/22          |
| WV2    | 11/27/17         | WV3    | 2/19/22          |
| WV2    | 3/26/18          | WV2    | 10/3/22          |
| WV2    | 9/30/18          | WV3    | 11/21/22         |
| WV3    | 2/9/20           | WV3    | 12/25/22         |
| WV2    | 3/22/21          | WV2    | 2/16/23          |

10

Table 1: Date and sensor of Worldview images used for this study

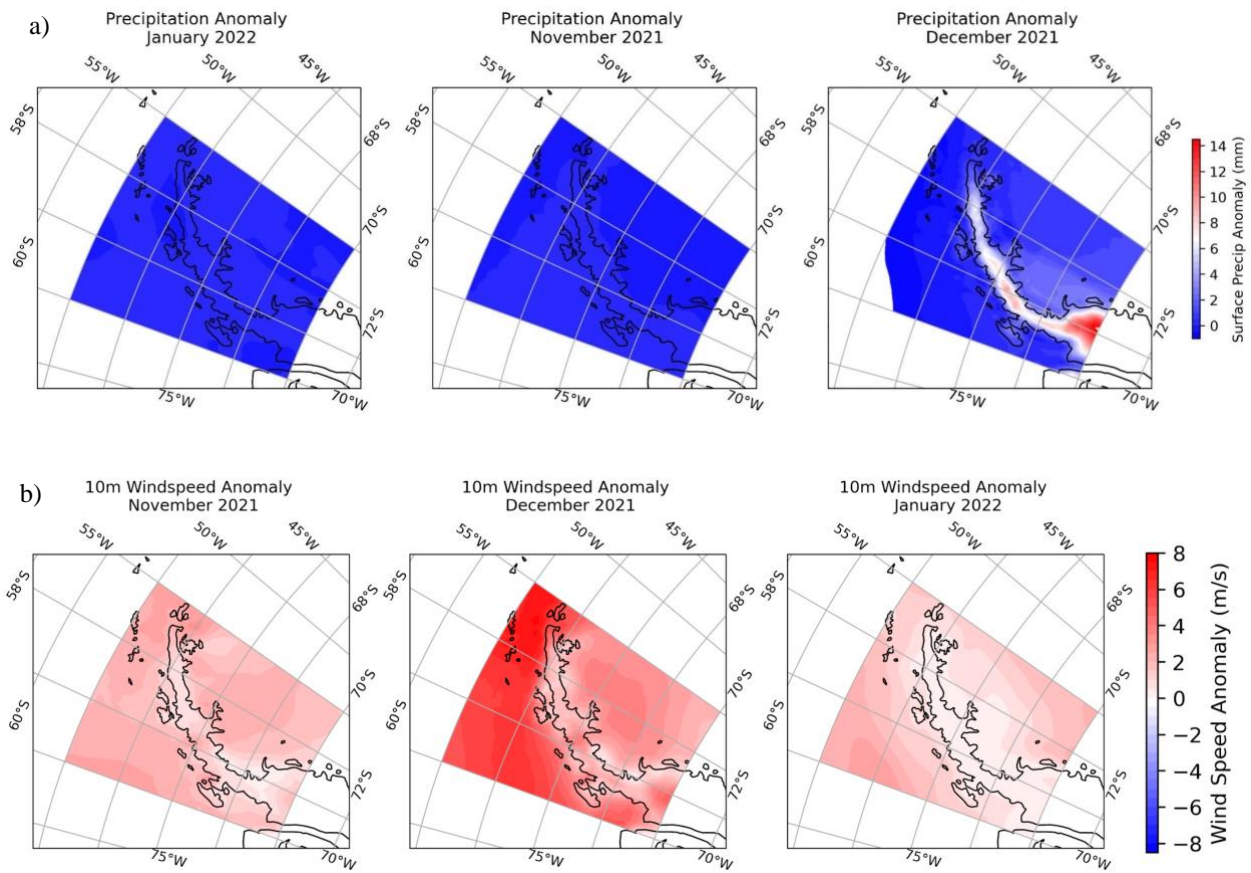

15

Figure S1

Precipitation and windspeed anomalies (1979-2022) for the AP region in November 2021, December 2021, and January 2022.

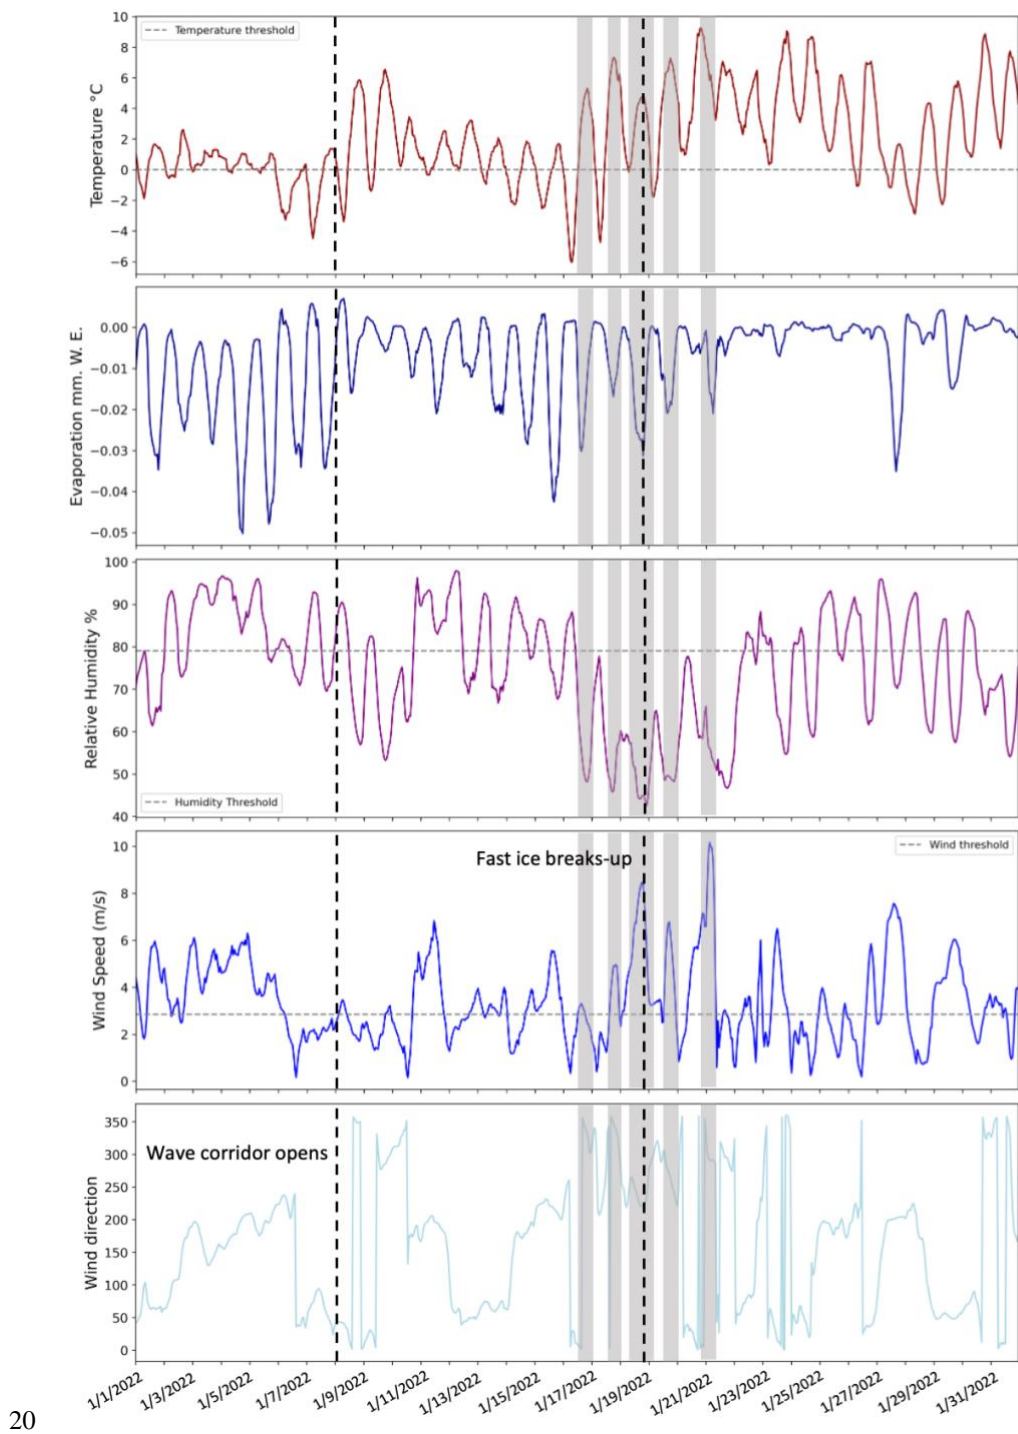

Figure S2

ERA-5 climate variables on hourly time scale during January 2022. The horizontal dashed lines indicate foehn wind thresholds determined by Laffin et al., 2022. The vertical dashed lines show the when the wave corridor opened and when the fast ice broke-up. The gray shaded lines indicate periods when all of the foehn wind thresholds were met, suggesting times of foehn wind events.

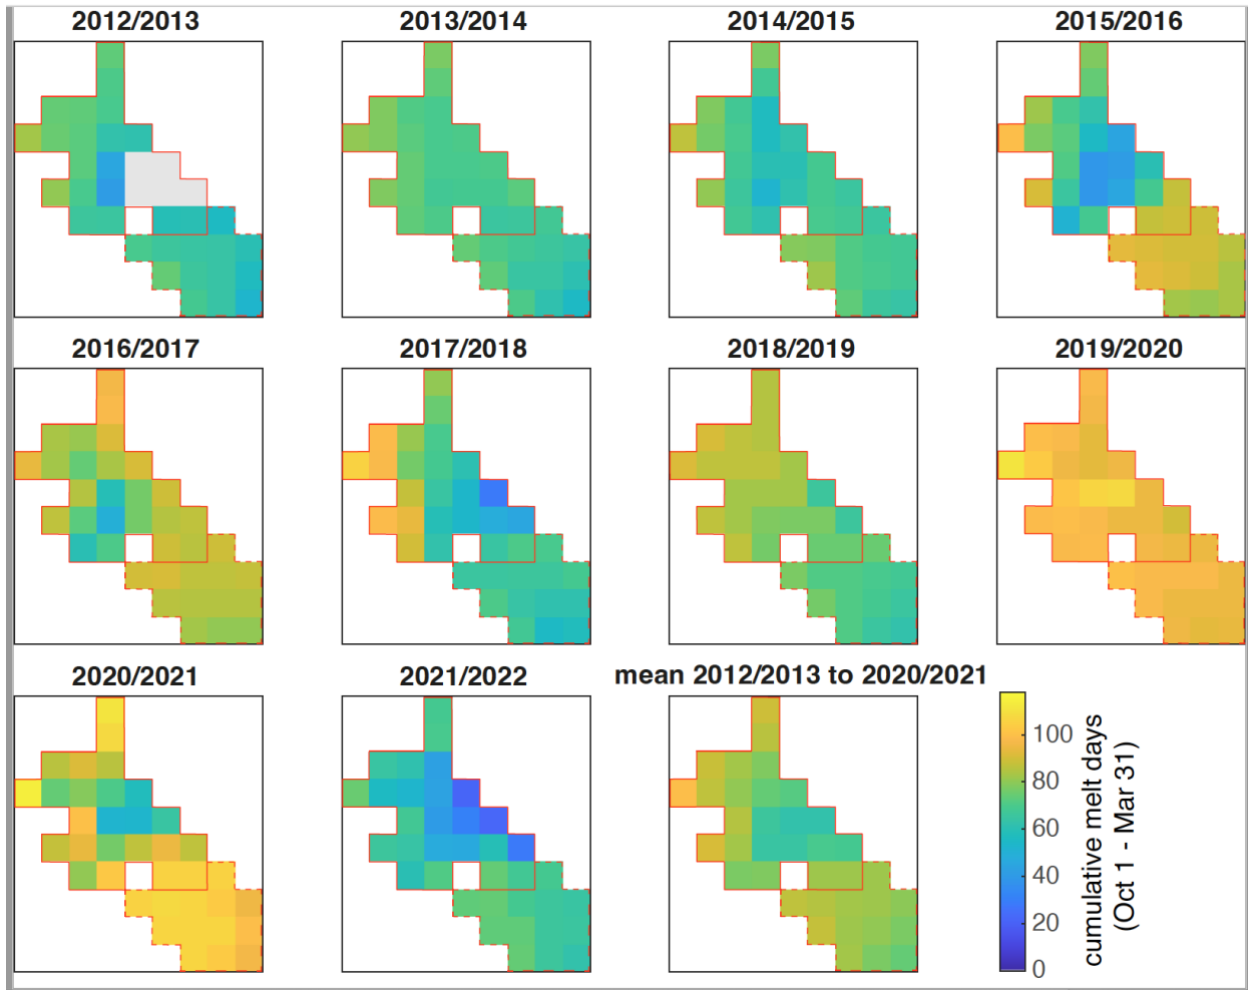

Figure S3

30 Cumulative melt day maps from 2012/2013 to 2020/2021 for the Larsen B embayment (solid lines) and Scar Inlet Ice Shelf (dashed lines).

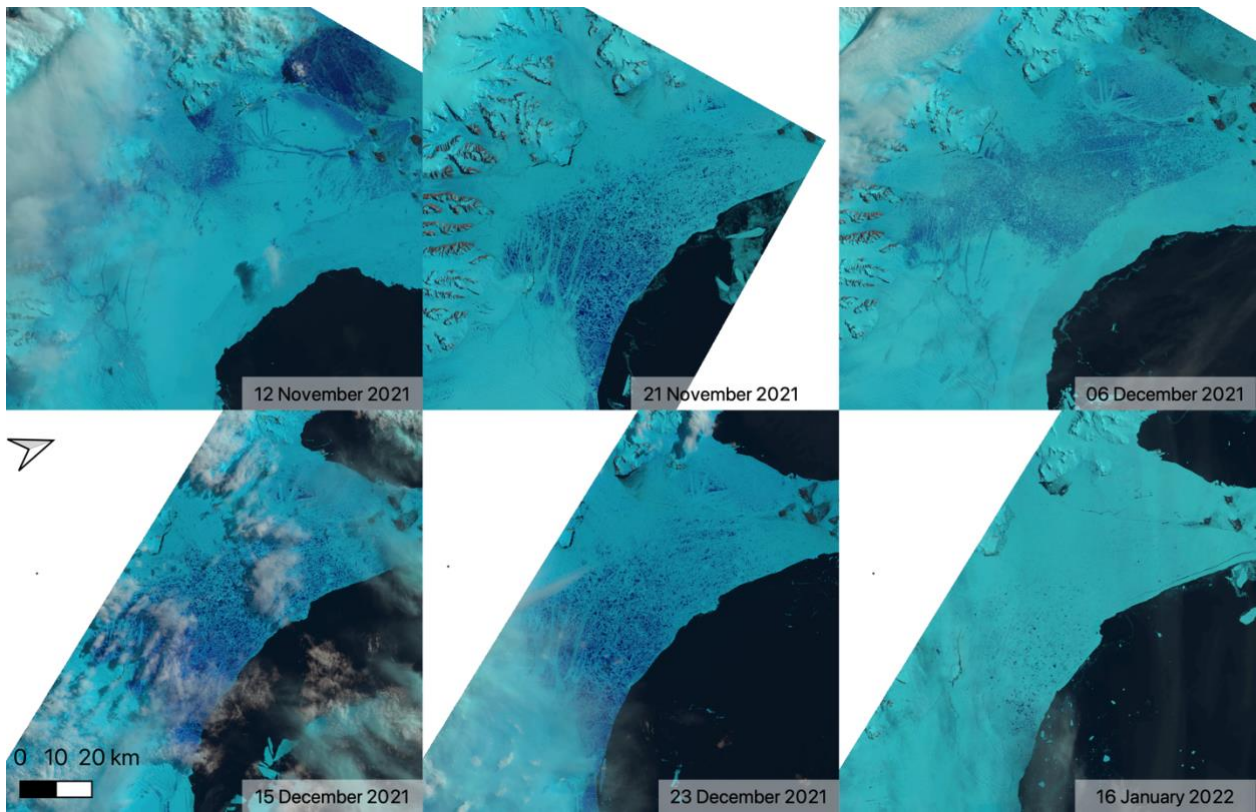

35

Figure S4

Melt pond evolution using Landsat imagery from November 2021 to January 2022.

20 Jan, 2010-2022  
AMSRE and AMSR-2 daily Sea Ice concentraiaon, Weddell Sea

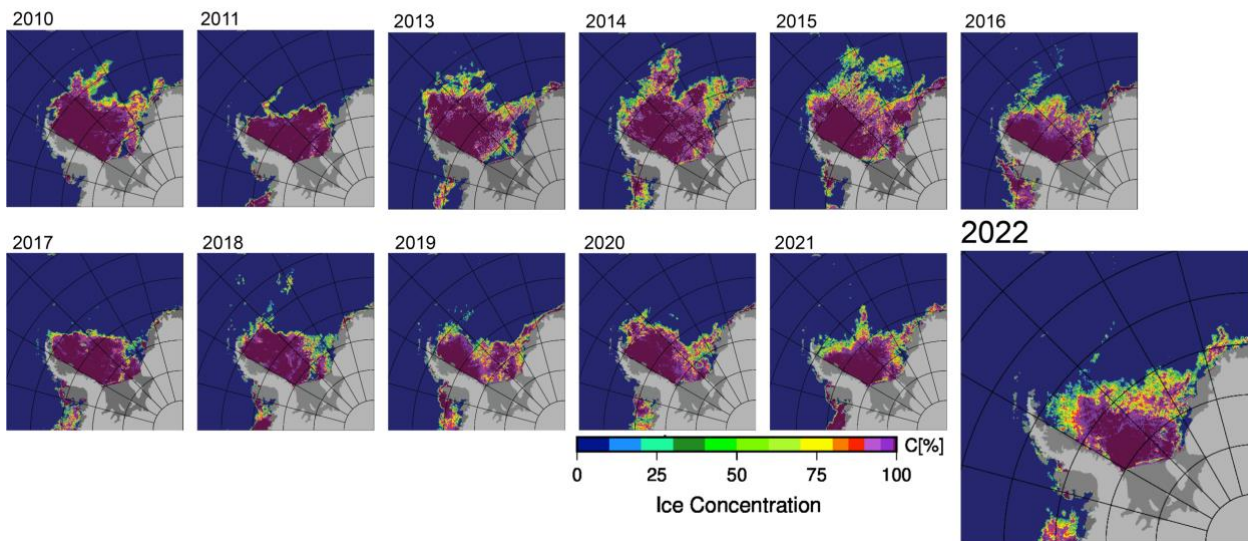

40

Figure S5

Sea ice concentration in Weddell Sea on 20 January from 2010 to 2011 and 2013 to 2022. The open corridor was not present in any of the previous seasons on record during this time of year.

45

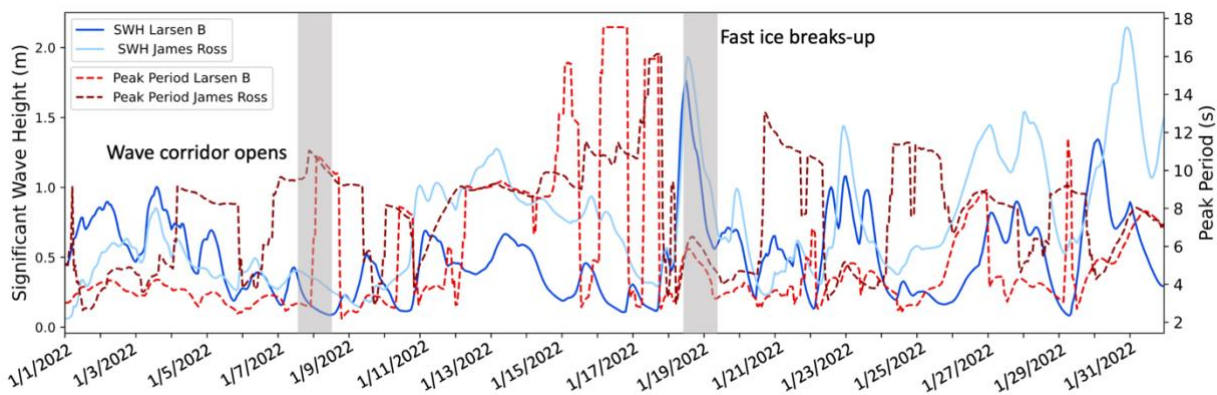

Figure S6

We obtain ocean wave-field data from the WaveWatch III model hindcast from the Collaboration for Australian Weather and Climate Research (CAWCR; Wave Hindcast Aggregated Collection; Durrant et al., 2019). From June 2013 onwards the dataset is generated using WaveWatch III v4.18 wave model forced with NCEP CFSv2 hourly winds and daily sea ice producing gridded spectral wave data on a global 0.4 (24 arcminute) grid. Here we examine an hourly time series of the variables for

January 2022, averaging over four grid cells in front of the Larsen B embayment and near the James Ross Island, where a wave corridor was present.

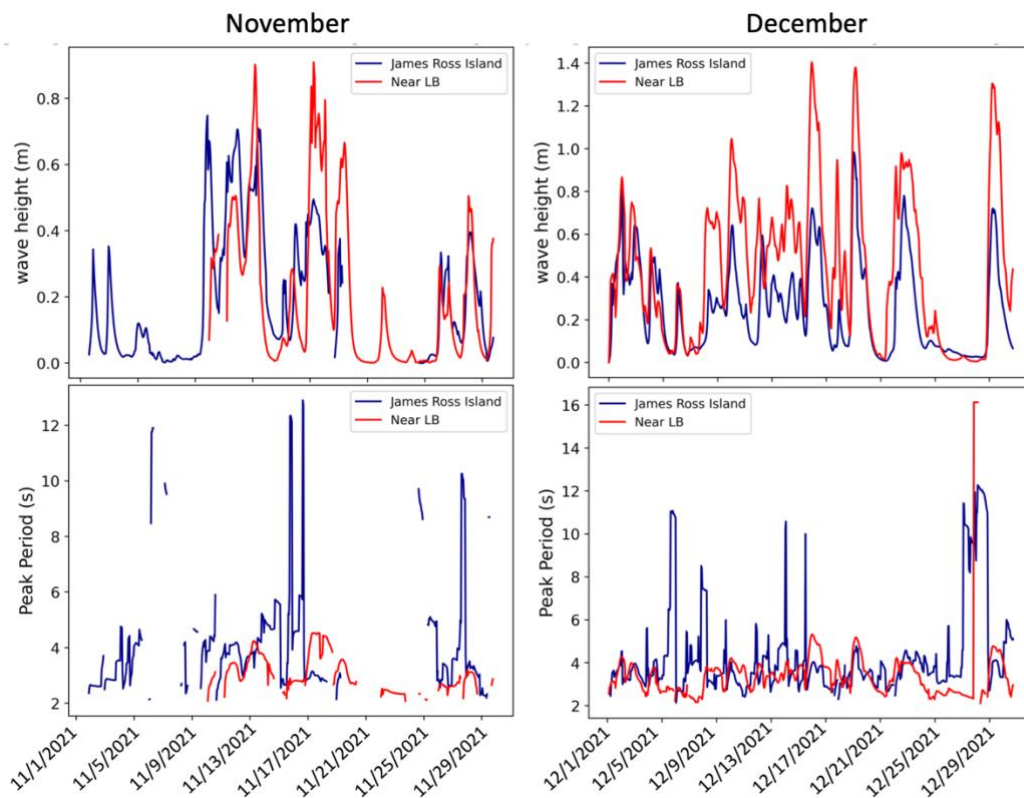

55

Figure S7

Wavewatch wave data showing the peak period and significant wave height for November and December 2021 for locations near James Ross Island and in front of the Larsen B embayment.

60

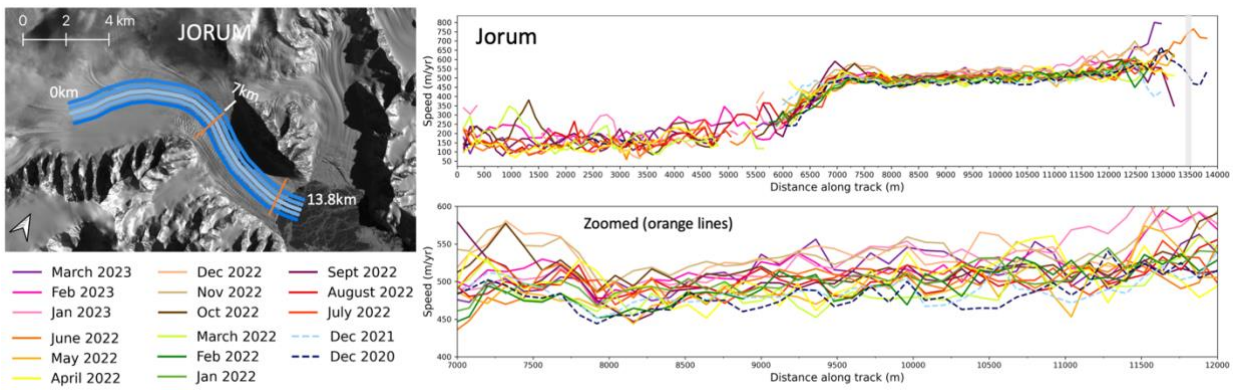

Figure S8

Jorum Glacier speeds derived from the ASF Vertex Tool and Hyp3 pipeline using Sentinel 1 imagery from December 2020 to  
 65 March 2023.

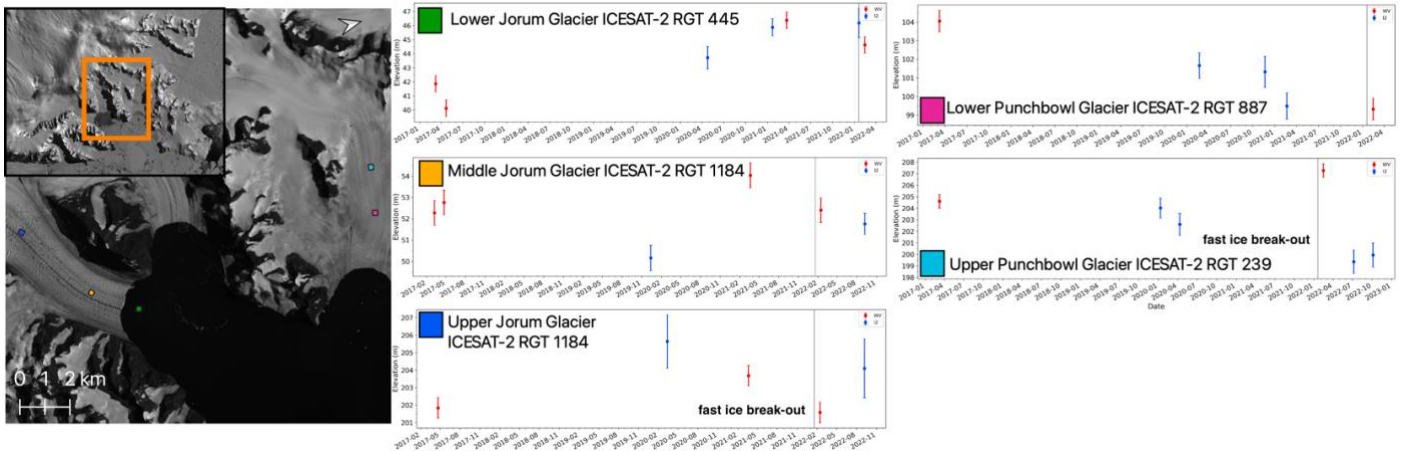

Figure S9

70 Jorum and Punchbowl elevation changes from ICESat and Worldview DEMs.

References:

Durrant, T., Hemer, M., Smith, G., Trenham, C., Greenslade, D.: CAWCR Wave Hindcast - Aggregated Collection. v5.

75 CSIRO. Service Collection. <http://hdl.handle.net/102.100.100/137152?index=1>, 2019.
